# Supplementary material for: Akkermansia muciniphila modifies the association between metal exposure during pregnancy and depressive symptoms in late childhood
Source: Research Square preprint supplement (doi:10.21203/rs.3.rs-3922286/v1), 2024-02-14
Supplement: Supplementary file 1 [file fe054b195422dce055e846f7.docx]

**Supplemental Material**

***Akkermansia muciniphila* modifies the association between metal exposure during pregnancy and depressive symptoms in late childhood**

Vishal Midya1*, Kiran Nagdeo1, Jamil M. Lane1, Libni A. Torres-Olascoaga2, Gabriela Gil Martínez2, Megan K. Horton1, Chris Gennings1, Martha Maria Téllez-Rojo2, Robert O. Wright1, Manish Arora1, Shoshannah Eggers1,3

1. Department of Environmental Medicine and Public Health, Icahn School of Medicine at Mount Sinai, New York, New York, USA;

2. Center for Research on Nutrition and Health, National Institute of Public Health, Cuernavaca, Mexico;

3. Department of Epidemiology, University of Iowa College of Public Health, Iowa City, Iowa, USA

* Corresponding author

**Table of Content**

1. ***Supplemental Table 1:*** Median (Inter Quartile Range) of Concentrations (ug/L) of Prenatal Exposures to Metals in the 2nd and 3rd trimesters
2. ***Supplemental Table 2:*** Median (Inter Quartile Range) of Concentrations (ug/L) of Prenatal Exposures to Metals in the 2nd and 3rd trimesters by the presence of Akkermansia muciniphila
3. ***Supplemental Table 3:*** List of top ten metal combinations with stability scores
4. ***Supplemental Table 4:*** Comparison between Model-based and Randomization-based p-values from Figure 2C
5. ***Supplemental Figure 1:*** Spearman correlation between the metal concentrations at second and third trimesters
6. ***Supplementary Figure 2***: Closed-looped network for forced-directed graph
7. ***Supplementary Figure 3***: Covariate-balanced love plot
8. Association between log(t-CDI) and metal-microbial cliques (increase each threshold by 10 percentiles)
9. ***Supplementary Figure 4:*** Association between log(t-CDI) and metal cliques and absence of Akkermansia muciniphila (decrease each threshold by 10 percentiles)
10. ***Supplementary Figure 5***: Association between log(t-CDI) and metal cliques and absence of Akkermansia muciniphila (increase each threshold by 10 percentiles)
11. ***Supplementary Figure 6***: Association between binarized t-CDI score and metal cliques and absence of Akkermansia muciniphila

**Supplementary Table 1: Median (Inter Quartile Range) of Concentrations (ug/L) of Prenatal Exposures to Metals in the 2nd and 3rd trimesters**

|  | **Second Trimester** | **Third Trimester** |
| --- | --- | --- |
| ***Pb*** | 25.48 (21.33) | 27.72 (24.97) |
| ***As*** | 0.68 (0.25) | 0.70 (0.45) |
| ***Cd*** | 0.23 (0.16) | 0.22 (0.17) |
| ***Mn*** | 13.26 (6.23) | 17.77 (9.15) |
| ***Co*** | 0.18 (0.12) | 0.25 (0.20) |
| ***Zn*** | 5,928.96 (1,220.87) | 6,214.53 (1,139.77) |
| ***Cr*** | 0.45 (0.49) | 0.52 (0.41) |
| ***Cs*** | 2.71 (1.28) | 2.52 (0.99) |
| ***Cu*** | 1,515.92 (237.58) | 1,588.37 (263.31) |
| ***Sb*** | 3.57 (1.25) | 3.61 (1.59) |
| ***Se*** | 241.08 (35.20) | 239.02 (35.93) |

Metals included are lead (Pb), arsenic (As), cadmium (Cd), manganese (Mn), cobalt (Co), zinc (Zn), chromium (Cr), cesium (Cs), copper (Cu), antimony (Sb), and selenium (Se).; The sample size is 112

**Supplementary Table 2: Median (Inter Quartile Range) of Concentrations (ug/L) of Prenatal Exposures to Metals in the 2nd and 3rd trimesters by the presence of *Akkermansia muciniphila***

|  | **Second Trimester** | | **Third Trimester** | |
| --- | --- | --- | --- | --- |
|  | ***A. muciniphila***  ***absent*** | ***A. muciniphila***  ***present*** | ***A. muciniphila***  ***absent*** | ***A. muciniphila***  ***present*** |
| ***Pb*** | 27.49 (22.97) | 21.39 (13.85) | 30.35 (24.84) | 23.79 (18.86) |
| ***As*** | 0.70 (0.24) | 0.64 (0.37) | 0.70 (0.44) | 0.70 (0.60) |
| ***Cd*** | 0.23 (0.16) | 0.25 (0.14) | 0.21 (0.16) | 0.23 (0.17) |
| ***Mn*** | 13.42 (6.23) | 12.69 (5.31) | 17.60 (7.74) | 19.38 (10.09) |
| ***Co*** | 0.19 (0.11) | 0.14 (0.12) | 0.25 (0.18) | 0.24 (0.20) |
| ***Zn*** | 5,931.43 (1,285.40) | 5,909.98 (923.37) | 6,238.85 (1,195.80) | 6,190.04 (566.07) |
| ***Cr*** | 0.43 (0.51) | 0.48 (0.41) | 0.54 (0.39) | 0.49 (0.50) |
| ***Cs*** | 2.75 (1.26) | 2.38 (1.09) | 2.53 (1.15) | 2.51 (0.71) |
| ***Cu*** | 1,517.88 (234.43) | 1,513.96 (220.26) | 1,584.31 (253.11) | 1,603.42 (325.42) |
| ***Sb*** | 3.60 (1.19) | 3.06 (1.23) | 3.49 (1.59) | 3.86 (1.82) |
| ***Se*** | 242.33 (30.54) | 235.82 (42.55) | 239.51 (35.11) | 237.06 (37.81) |

Metals included are lead (Pb), arsenic (As), cadmium (Cd), manganese (Mn), cobalt (Co), zinc (Zn), chromium (Cr), cesium (Cs), copper (Cu), antimony (Sb), and selenium (Se). The sample size is 112

**Supplementary Table 3: list of top ten metal combinations with stability scores**

| **Combinations** | **Stability, n (%)** |
| --- | --- |
| Co at 3rd trimester – Zn at 2nd trimester | 1271 (16.0) |
| Cr at 2nd trimester – Zn at 2nd trimester | 842 (10.6) |
| Co at 3rd trimester – Cr at 2nd trimester | 666 (8.4) |
| Cr at 3rd trimester – Zn at 2nd trimester | 436 (5.5) |
| Mn at 3rd trimester – Zn at 2nd trimester | 336 (4.2) |
| As at 3rd trimester – Zn at 2nd trimester | 319 (4.0) |
| As at 3rd trimester – Co at 3rd trimester | 289 (3.6) |
| Co at 3rd trimester – Cr at 3rd trimester | 273 (3.4) |
| Se at 3rd trimester – Zn at 2nd trimester | 224 (2.8) |
| Co at 3rd trimester – Mn at 3rd trimester | 209 (2.6) |

These listed combinations can be converted to cliques by estimating their thresholds. In total, rh-SiRF generated 123 unique combinations. The top three combinations were chosen for further analysis, since their stability is more than 5% and they form a closed-looped network.

**Supplementary Table 4: Comparison between Model-based and Randomization-based p-values from Figure 2C**

| **Associations** | **Model-based p-value** | **Randomization-based p-value** |
| --- | --- | --- |
| Metal-clique | 0.00697 | < 1e-05 |
| No *A. muciniphila* | 0.00304 | < 1e-05 |
| Children with Metal-clique but No *A. muciniphila* | 0.000326 | < 1e-05 |
| Children with Metal clique & *A. muciniphila* | 0.367 | 0.3709 |

**Supplementary Figure 1: Spearman correlation between the metal concentrations at second and third trimesters for study participants (n = 112)**

**
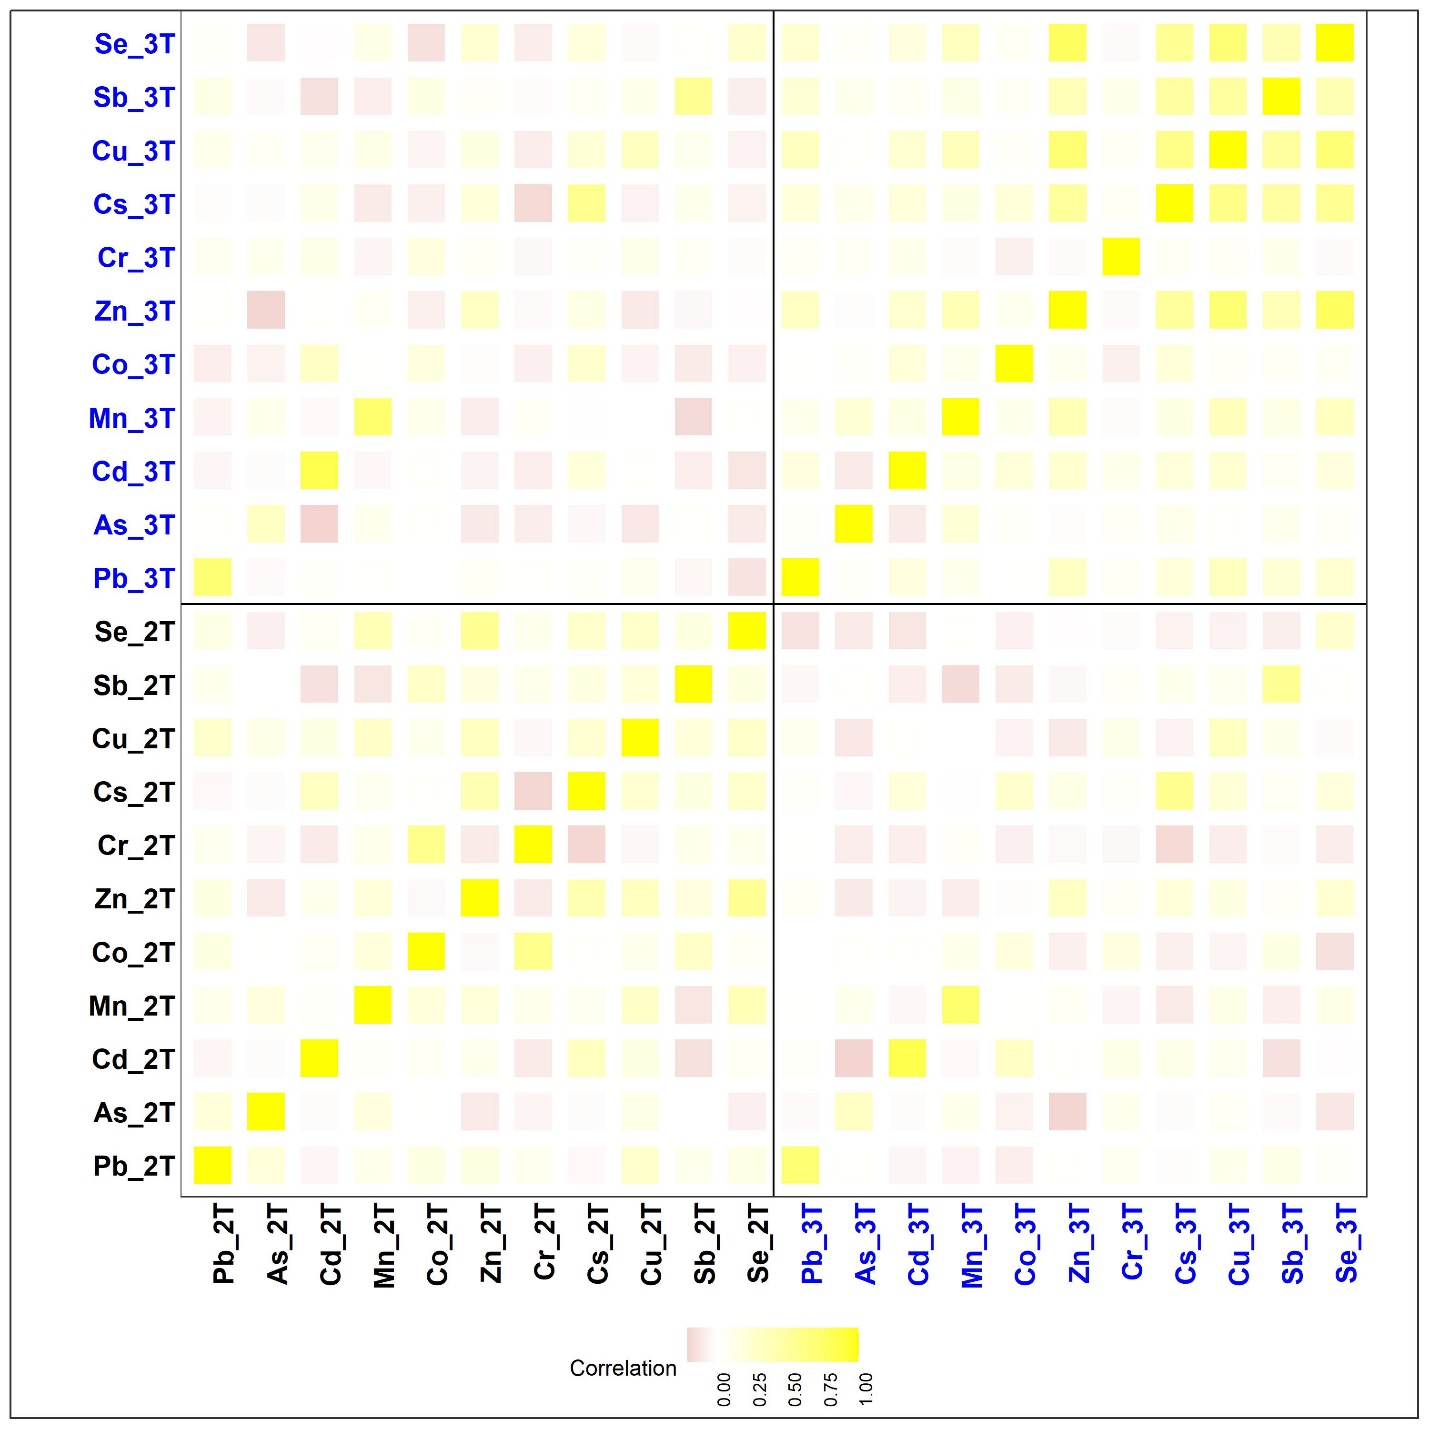
**Metals included are lead (Pb), arsenic (As), cadmium (Cd), manganese (Mn), cobalt (Co), zinc (Zn), chromium (Cr), cesium (Cs), copper (Cu), antimony (Sb), and selenium (Se). 2T: second trimester, and 3T: third trimester.

**Supplementary Figure 2: Closed-looped network for forced-directed graph**

**
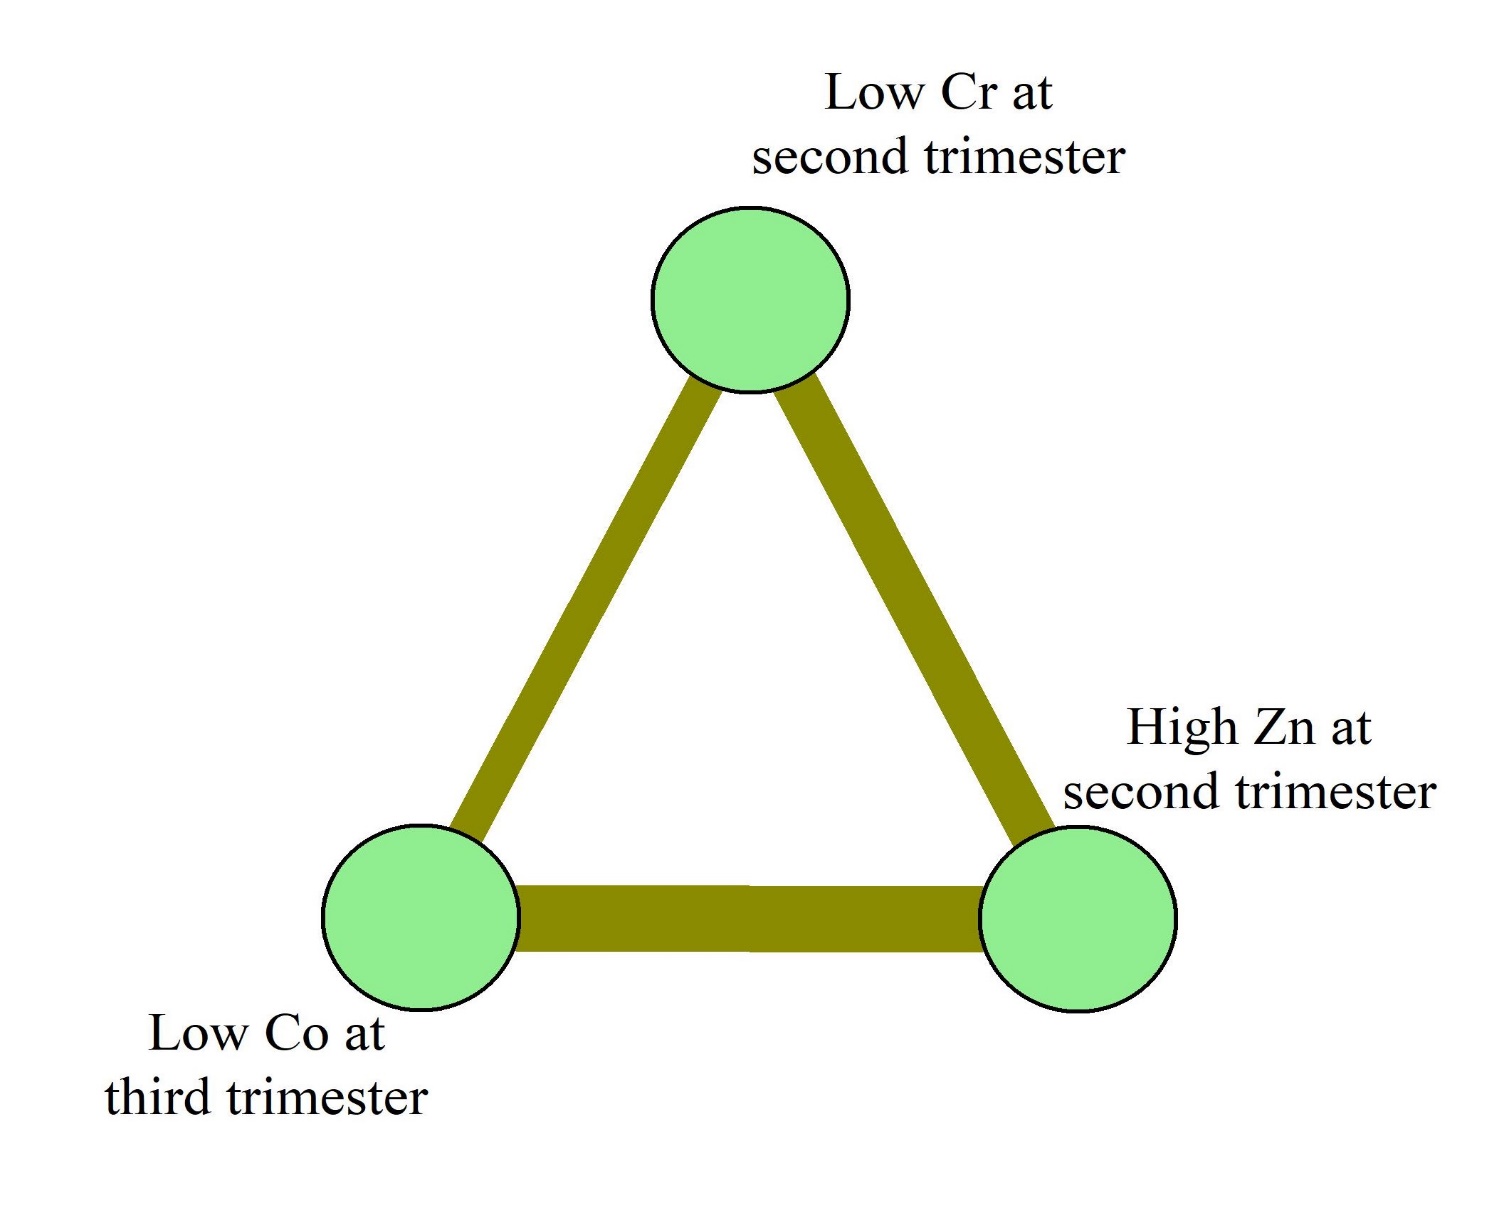
**

**Supplementary Figure 3:** **Covariate-balanced love plot**

**
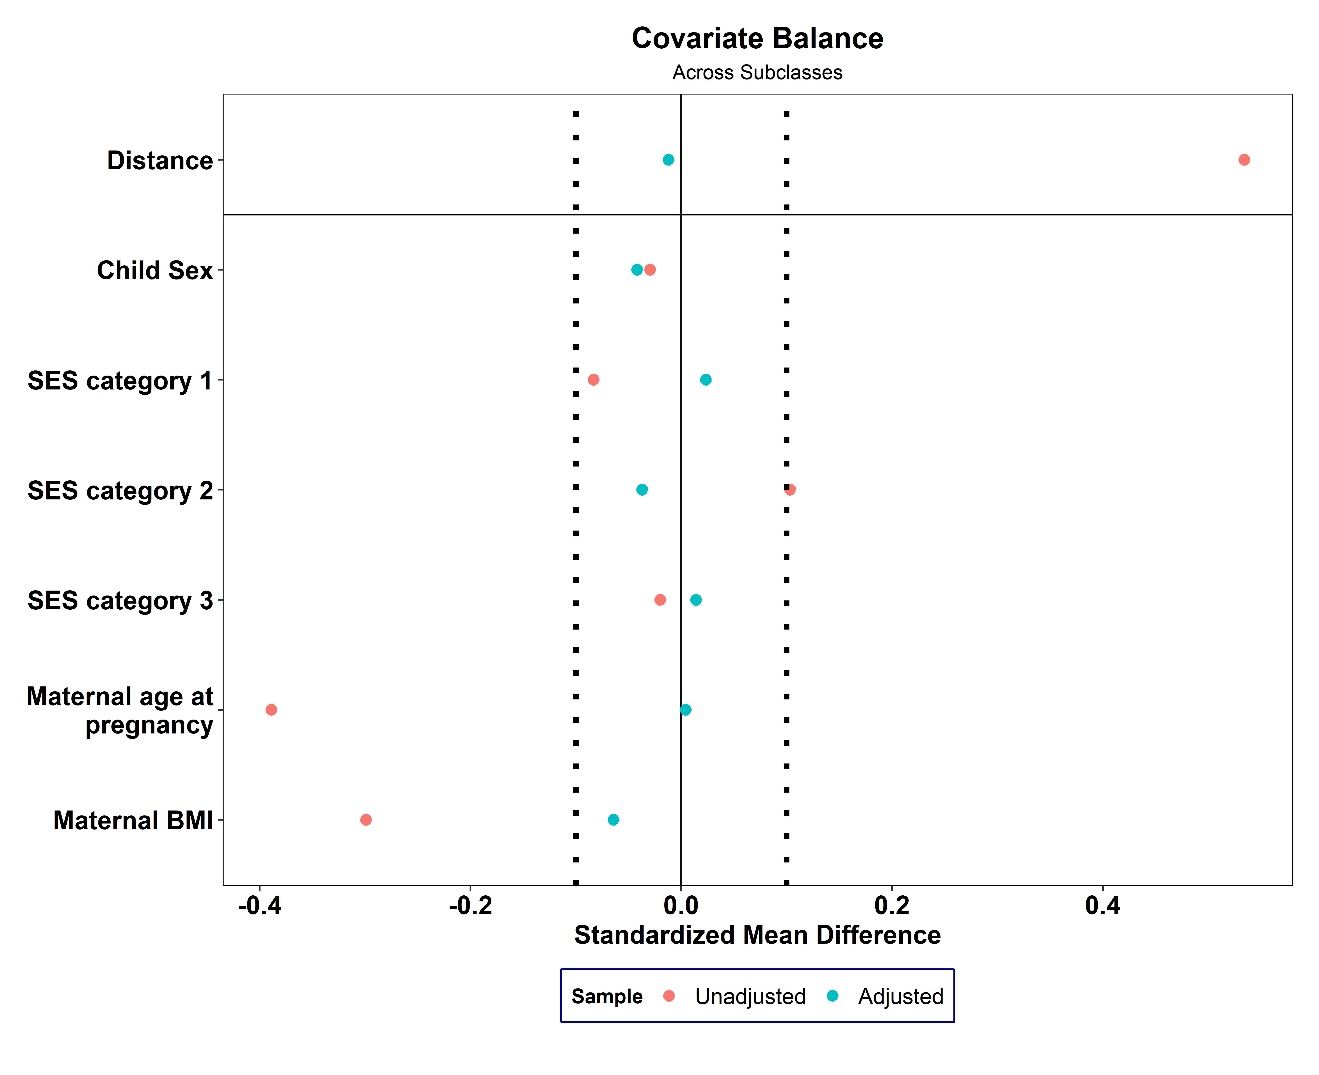
**Covariate-balancing was achieved using subclass matching procedure with the propensity score

**Supplementary Figure 4:** **Association between log(t-CDI) and metal cliques and absence of Akkermansia muciniphila (decrease each threshold by 10 percentiles)**

**
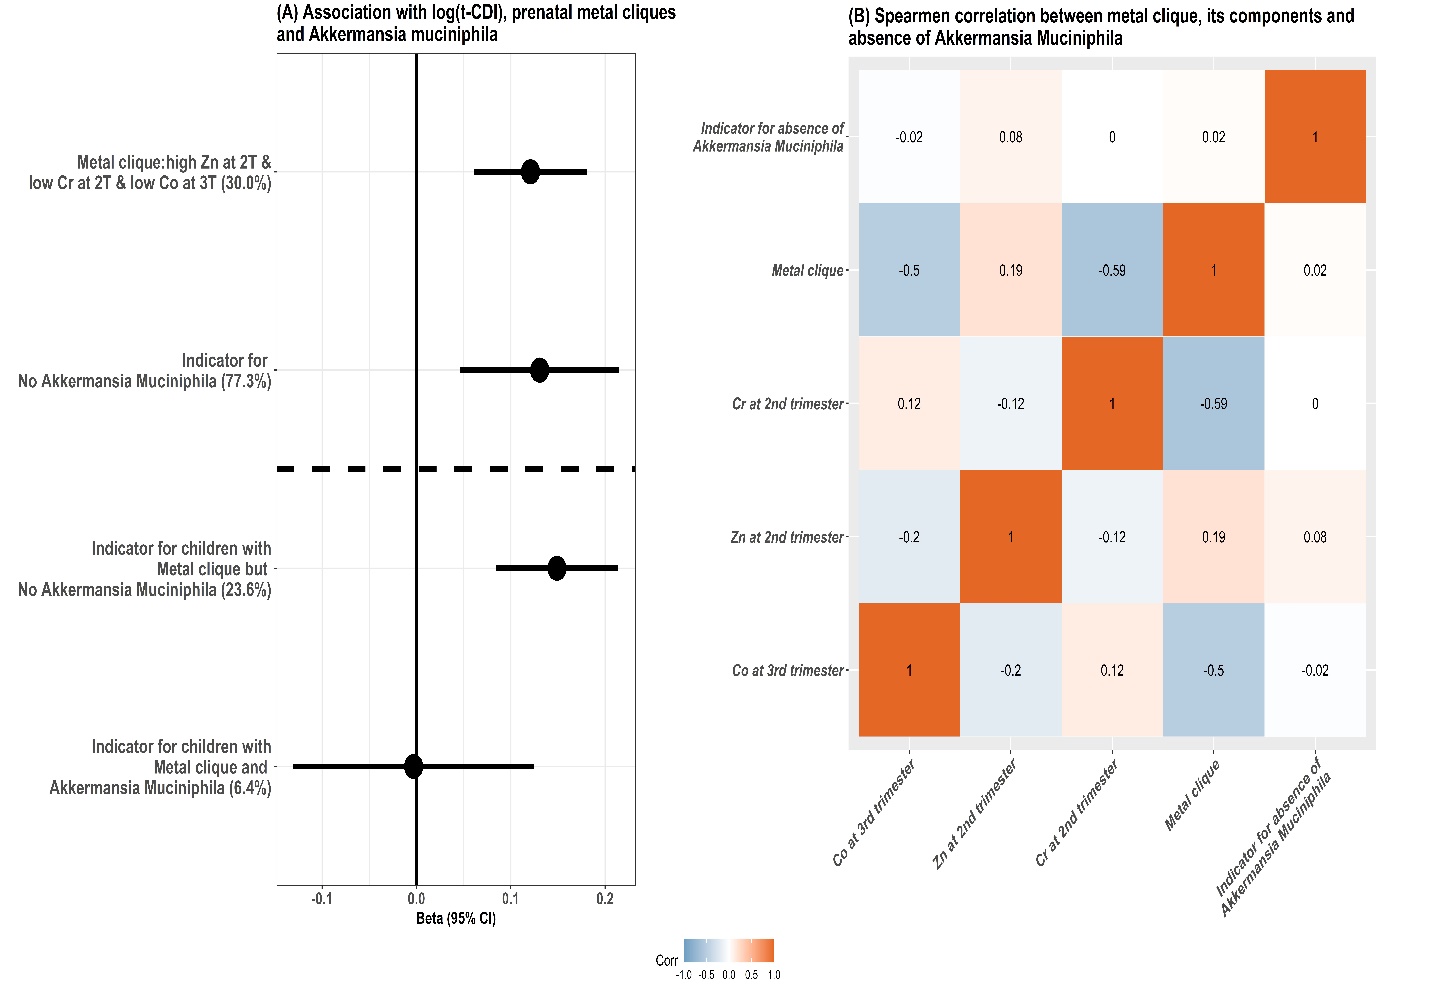
**Figure shows the beta coefficients and 95% CIs for the association with prenatal metal-clique (while decreasing each threshold by 10 percentile) and log-tCDI scores and the effect modification by the absence of *A. muciniphila*; the proportions of the sample characterized by the clique are shown in brackets on the y-axis.

**Supplementary Figure 5:** **Association between log(t-CDI) and metal cliques and absence of Akkermansia muciniphila (increase each threshold by 10 percentiles)**

**
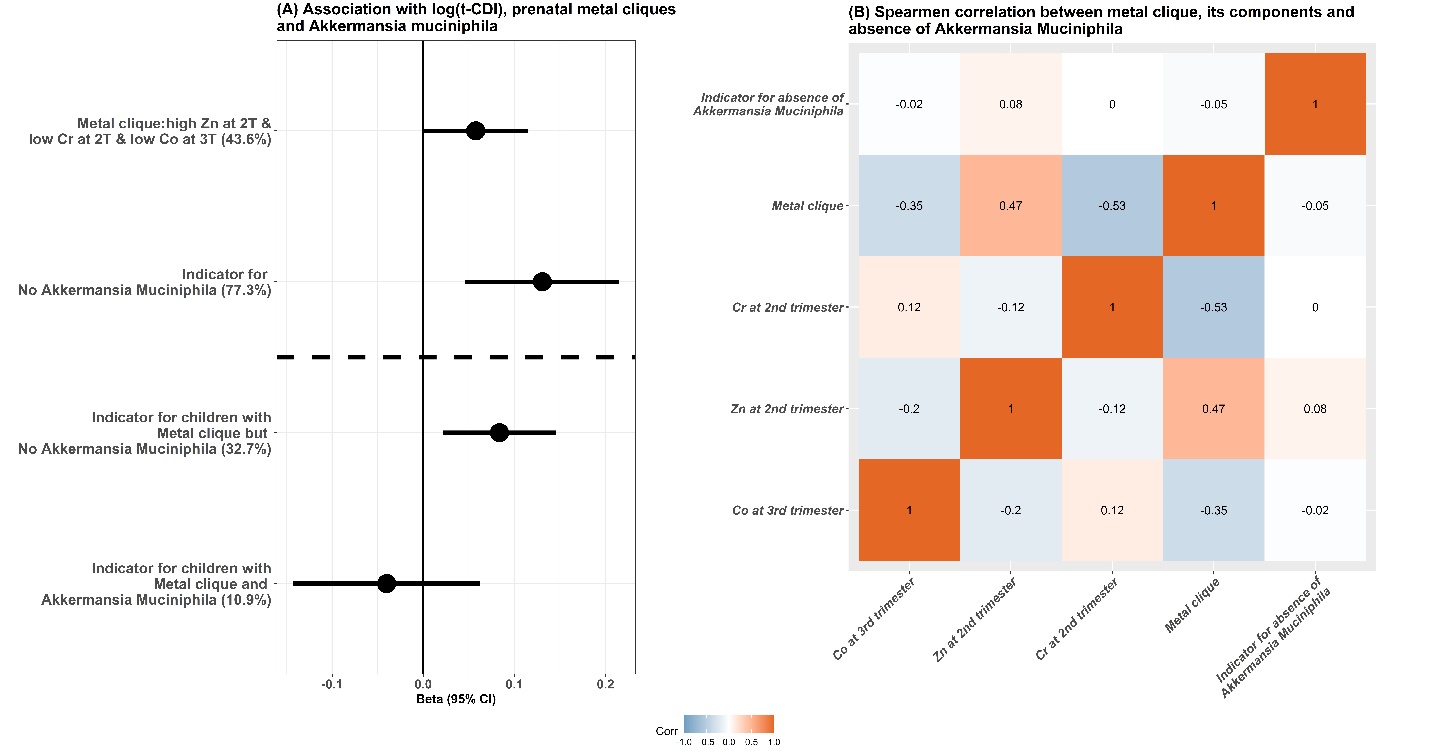
**Figure shows the beta coefficients and 95% CIs for the association with prenatal metal-clique (while increasing each threshold by 10 percentile) and log-tCDI scores and the effect modification by the absence of *A. muciniphila*; the proportions of the sample characterized by the clique are shown in brackets on the y-axis.

**Supplementary Figure 6:** **Association between binarized t-CDI score and metal cliques and absence of Akkermansia muciniphila**

**
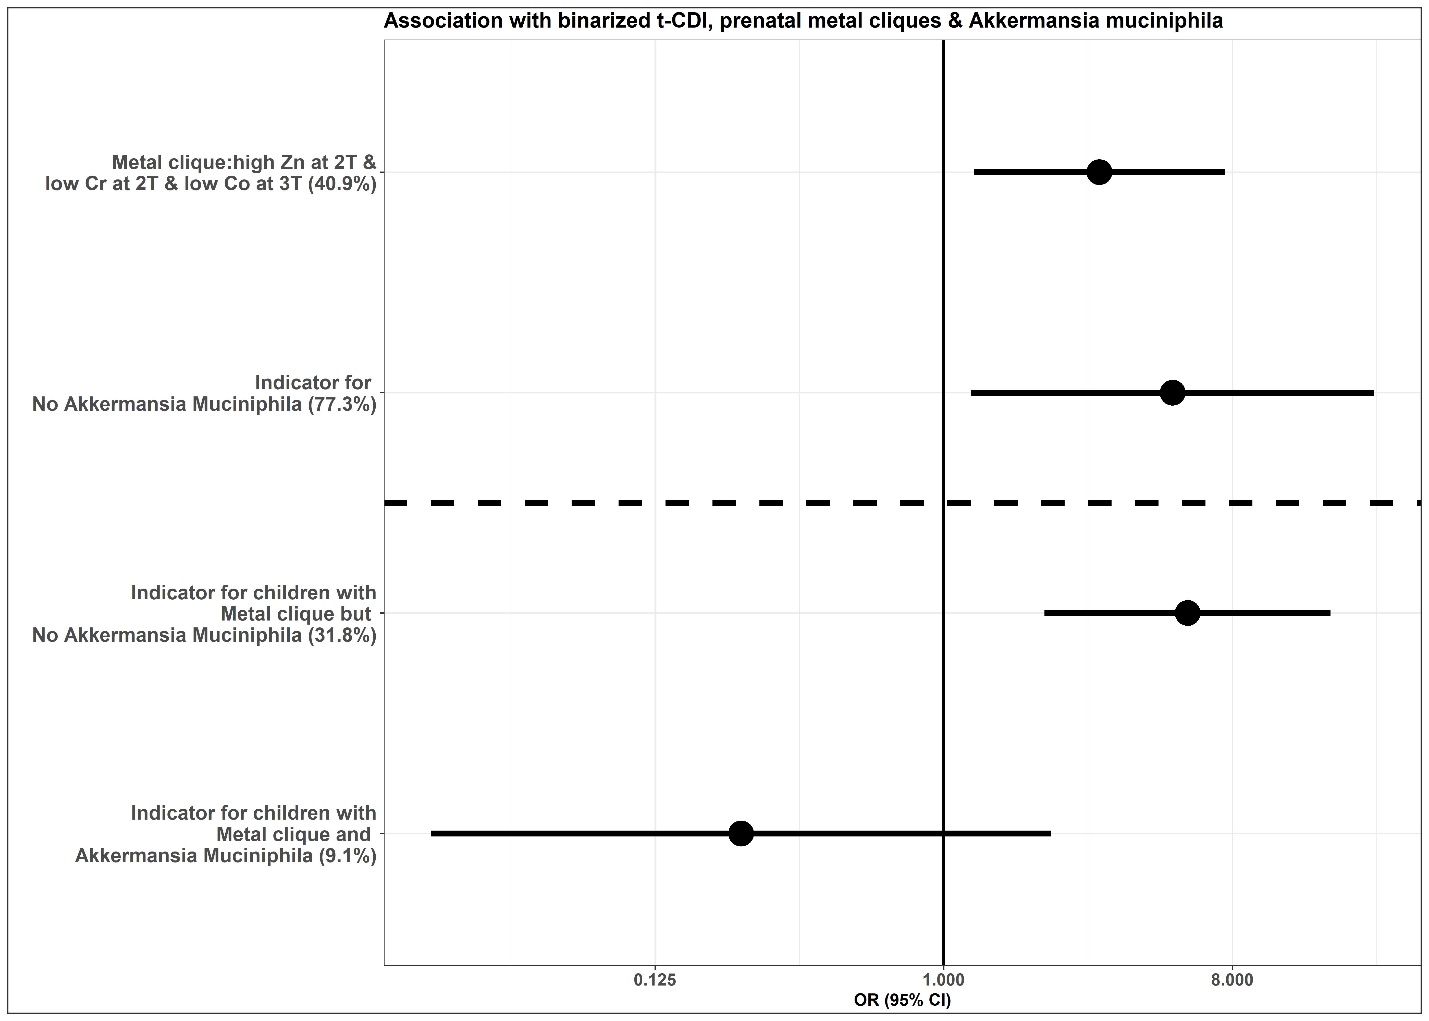
**Figure shows the association with prenatal metal-clique and binarized t-CDI scores (>= 75th percentile) and the effect modification by the absence of *A. muciniphila* in childhood gut microbiome.
